# Supplementary material for: Morphological and stage-specific transcriptome analyses reveal distinct regulatory programs underlying yam (Dioscorea alata L.) bulbil growth
Source: PubMed Central journal article supplement (PMC7242083; doi:10.1093/jxb/erz552), 2019-12-13
Supplement: erz552_suppl_supplementary_tables_s1-s3.pdf [file erz552_suppl_supplementary_tables_s1-s3.pdf]

**Supplementary Tables:**

**Table S1. List of the primer sequences used for qRT-PCR analyses**

| <b>Gene ID</b>   | <b>Gene Name</b> | <b>Forward primer (5'-3')</b> | <b>Reverse primer (5'-3')</b> |
|------------------|------------------|-------------------------------|-------------------------------|
| c131642.graph_c1 | SS4              | GTTTCCAATTGCCGCCATTG          | ATCGATCCGAAGCAGGCTCA          |
| c129481.graph_c0 | SBE1             | GGCAAGAGGCTATGCACCAA          | CACGGAATCGACACAGCCTT          |
| c119393.graph_c0 | ISA1             | AGTGGCCTCCCAGCAAGAAC          | GGATTGCGAGTTTGGTGGTG          |
| c135828.graph_c1 | PWD              | TGAGGAGTGGAAACGGAGGA          | CGTTCCATGTCTCCCGTGAT          |
| c130514.graph_c0 | SUS1             | CCACACGGTATAGCCCAGGA          | CCATGCCGACTTCATCATCA          |
| c129305.graph_c2 | VIF1             | TGCTCTACACCGGATCCACC          | CGCATCCGACTTTGTCCACT          |
| c118684.graph_c0 | SUS1-like        | TGAATGGCCACATCAGGTGG          | CAGGCTGTACAAAGGCGCCT          |
| c129337.graph_c0 | TAR3             | CCGACGCAGACAGTGGAAT           | GGTAACGTAGCCCATCCGGT          |
| c126329.graph_c0 | PIN1B            | GCAGTCGAGCTGCGAGAAGA          | AAACCGGAGGCGCTAAATGA          |
| c113758.graph_c0 | IAA15            | GTGCTGCGCGGTAACCTTTGT         | TTGAGAACGCTGATCCCCAA          |
| c130573.graph_c1 | ARF15            | AATGCACTCCACCCGGTTGT          | CCTTCCCAGGAGCTTGTTC           |
| c111520.graph_c0 | PhyB             | TTTCTGTCCAATGGTTGCA           | GCTCGTCGGAGAGGTTTTTG          |
| c130377.graph_c3 | Dio A            | GCCAACCTTGACGACTGCAT          | AATACTCTCGCCAGCTCGG           |
| c135265.graph_c3 | Dio B            | TTCACTGTTGCACGAGCAGC          | GTGGCTATGGCATGGAGCAG          |
| c129560.graph_c1 | CESA7            | GCAACACCATGATGGCCAAC          | GGTGTACGTCGGAACCGGTT          |
| c134554.graph_c3 | CHI              | GCCGCACTATGCATCTCCTG          | CCTGTCGAGCATGCCTCTGT          |
| c134934.graph_c0 | EGase            | GATGGCAAACCCCTCAATCGC         | TAAGGCCTCCGATGTCCTCG          |
| c124858.graph_c0 | EXPA1_like       | TGGCCATAGTGCAGTGTGGA          | TCCAGACCCATTTTCCGTCA          |
| c114615.graph_c0 | NAC              | AGTGCATTACCTCTGCCGGA          | TACCTGGCAATTCCCAAGGA          |
| c118218.graph_c0 | C2H2             | GACGTTTAGAGCGTTTGC            | CCGTAGATGCAATCGCAACC          |
| c116834.graph_c0 | AP2              | CAAAGGTGTCCGAGTGTGGC          | GTTTGGCCTTCTTACCCCGA          |
| c129895.graph_c0 | C3H              | CGGCCAGAGACAGTGCTGAT          | GGCACCTTGAGGAAACACA           |
| c125026.graph_c1 | WRKY             | TTGTAGAACGGACGGCTTGG          | CACATACGAAGGCGAGCACC          |
| c132918.graph_c1 | bHLH             | GATCCATTGCACCCCTCCTT          | TCAGGTAATCCTCCGCACGA          |
|                  | EF-1a-F          | TCAGGCTGACTGTGCTGTCT          | GTGGTGGCGTCCATCTTGTT          |

**Table S2. Summary of RNA-seq reads in yam bulbil transcriptome**

| Sample | Replicates | No.base in dataset (after QC) | No.clean reads | Mapped Ratio (%) | ≥Q30(%) |
|--------|------------|-------------------------------|----------------|------------------|---------|
| T01    | 1          | 16,655,479,736                | 56,017,015     | 73.59            | 94.27   |
|        | 2          | 14,579,803,638                | 49,112,048     | 72.8             | 94.19   |
|        | 3          | 19,681,813,798                | 66,142,499     | 72.18            | 93.99   |
| T02    | 1          | 18,307,036,212                | 61,563,310     | 73.76            | 93.82   |
|        | 2          | 17,066,897,702                | 57,421,095     | 73.57            | 93.8    |
|        | 3          | 18,132,828,188                | 60,865,352     | 74.12            | 93.89   |
| T03    | 1          | 18,176,433,892                | 61,253,397     | 71.76            | 93.5    |
|        | 2          | 16,828,368,454                | 56,561,893     | 71.94            | 93.24   |
|        | 3          | 15,525,725,344                | 52,251,678     | 72.85            | 93.59   |
| T04    | 1          | 15,037,966,578                | 50,516,227     | 72.66            | 93.59   |
|        | 2          | 18,097,731,650                | 61,231,289     | 72.38            | 93.88   |
|        | 3          | 16,247,396,402                | 54,773,454     | 72.37            | 93.76   |

T1, T2, T3 and T4 mean the initiation, early, middle and mature stages of bulbil formation, respectively.

**Table S3. Assembly statistics for yam bulbil transcriptome**

| item                     | Transcripts     | Unigenes       |
|--------------------------|-----------------|----------------|
| No.of 200-300 bp reads   | 44,604 (22.38%) | 400,88(40.92%) |
| No.of 300-500 bp reads   | 27,060(13.58%)  | 17308(17.67%)  |
| No.of 500-1000 bp reads  | 41,173(20.66%)  | 18361(18.74%)  |
| No.of 1000-2000 bp reads | 44,579(22.37%)  | 12195(12.45%)  |
| No. of >2000 bp reads    | 41,853(21.00%)  | 10003(10.21%)  |
| Total Number             | 199,270         | 97,956         |
| Total Length (bp)        | 250,797,988     | 79,527,036     |
| N50 Length (bp)          | 2,173           | 1,579          |
| Mean Length (bp)         | 1,258           | 812            |
