# Supplementary material for: Morphological and stage-specific transcriptome analyses reveal distinct regulatory programs underlying yam (Dioscorea alata L.) bulbil growth
Source: PubMed Central journal article supplement (PMC7242083; doi:10.1093/jxb/erz552), 2019-12-13
Supplement: erz552_suppl_supplementary_tables_s5-s6.pdf [file erz552_suppl_supplementary_tables_s5-s6.pdf]

**Table S5 List of the most enriched GO terms**

| GO. ID                                 | GO terms                                                                           | Number of DEGs | P-value  | Corrected_P-value |
|----------------------------------------|------------------------------------------------------------------------------------|----------------|----------|-------------------|
| <b>Biological Process (GO:0008150)</b> |                                                                                    |                |          |                   |
| GO:0006306                             | DNA methylation                                                                    | 31             | 6.52E-18 | 8.32E-15          |
| GO:0051567                             | histone H3-K9 methylation                                                          | 27             | 2.60E-14 | 3.31E-11          |
| GO:0051726                             | regulation of cell cycle                                                           | 22             | 1.53E-13 | 1.96E-10          |
| GO:0008283                             | cell proliferation                                                                 | 26             | 2.20E-13 | 2.81E-10          |
| GO:0006275                             | regulation of DNA replication                                                      | 22             | 6.86E-13 | 8.76E-10          |
| GO:0006261                             | DNA-dependent DNA replication                                                      | 18             | 9.30E-11 | 1.19E-07          |
| GO:0000911                             | cytokinesis by cell plate formation                                                | 23             | 2.28E-10 | 2.92E-07          |
| GO:0080167                             | response to karrikin                                                               | 22             | 5.45E-09 | 6.95E-06          |
| GO:0016458                             | gene silencing                                                                     | 10             | 1.90E-08 | 2.43E-05          |
| GO:0009611                             | response to wounding                                                               | 27             | 8.84E-08 | 0.000112827       |
| GO:0031047                             | gene silencing by RNA                                                              | 15             | 8.94E-08 | 0.000114121       |
| GO:0019288                             | isopentenyl diphosphate biosynthetic process, methylerythritol 4-phosphate pathway | 34             | 1.94E-07 | 0.000248318       |
| GO:0019252                             | starch biosynthetic process                                                        | 27             | 2.37E-07 | 0.000303031       |
| GO:0010075                             | regulation of meristem growth                                                      | 16             | 2.46E-07 | 0.00030454        |
| GO:0031048                             | chromatin silencing by small RNA                                                   | 13             | 2.53E-07 | 0.000322463       |
| GO:0006468                             | protein phosphorylation                                                            | 112            | 7.29E-07 | 0.000930987       |
| GO:0016444                             | somatic cell DNA recombination                                                     | 9              | 1.12E-06 | 0.001436329       |
| GO:0009409                             | response to cold                                                                   | 41             | 1.46E-06 | 0.001864062       |
| GO:0006342                             | chromatin silencing                                                                | 14             | 1.69E-06 | 0.002160777       |
| GO:0009813                             | flavonoid biosynthetic process                                                     | 11             | 2.17E-06 | 0.002769149       |
| GO:0009416                             | response to light stimulus                                                         | 21             | 2.33E-06 | 0.002981311       |
| GO:0007018                             | microtubule-based movement                                                         | 18             | 4.09E-06 | 0.005224642       |
| GO:0010189                             | vitamin E biosynthetic process                                                     | 6              | 5.96E-06 | 0.007616388       |
| GO:0048438                             | floral whorl development                                                           | 8              | 7.38E-06 | 0.009421973       |
| <b>Molecular Function(GO:0003674)</b>  |                                                                                    |                |          |                   |
| GO:0004672                             | protein kinase activity                                                            | 73             | 0        | 0                 |
| GO:0016210                             | naringenin-chalcone synthase activity                                              | 11             | 6.68E-08 | 5.67E-05          |
| GO:0005488                             | binding                                                                            | 94             | 1.29E-07 | 0.000109534       |
| GO:0008094                             | DNA-dependent ATPase activity                                                      | 12             | 4.47E-07 | 0.000379851       |
| <b>Cellular Component(GO:0005575)</b>  |                                                                                    |                |          |                   |
| GO:0016023                             | cytoplasmic membrane-bounded vesicle                                               | 202            | 0        | 0                 |
| GO:0005886                             | plasma membrane                                                                    | 225            | 9.77E-10 | 2.07E-07          |
| GO:0048046                             | apoplast                                                                           | 65             | 1.76E-09 | 3.74E-07          |
| GO:0009505                             | plant-type cell wall                                                               | 33             | 5.14E-08 | 1.09E-05          |
| GO:0009535                             | chloroplast thylakoid membrane                                                     | 53             | 1.67E-07 | 3.55E-05          |
| GO:0009507                             | chloroplast                                                                        | 141            | 3.09E-07 | 6.55E-05          |

|            |                      |     |          |             |
|------------|----------------------|-----|----------|-------------|
| GO:0009536 | plastid              | 112 | 4.75E-07 | 0.000100612 |
| GO:0010287 | plastoglobule        | 21  | 9.77E-07 | 0.000207124 |
| GO:0016020 | membrane             | 247 | 1.50E-06 | 0.000318542 |
| GO:0005618 | cell wall            | 67  | 2.18E-06 | 0.000461655 |
| GO:0005874 | microtubule          | 30  | 1.59E-05 | 0.003372371 |
| GO:0009579 | thylakoid            | 21  | 2.52E-05 | 0.005336687 |
| GO:0009941 | chloroplast envelope | 68  | 2.55E-05 | 0.005413131 |

**Table S 6. Lists of significantly enriched KEGG pathways ( $p < 0.01$ )**

| #Kegg_pathway                                         | ko_id   | Cluter_frequency | Genome_frequency  | P-value   | Corrected_P-value |
|-------------------------------------------------------|---------|------------------|-------------------|-----------|-------------------|
| Starch and sucrose metabolism                         | ko00500 | 76 out of 1148   | 306 out of 10655  | 0         | 0                 |
| Phenylpropanoid biosynthesis                          | ko00940 | 64 out of 1148   | 217 out of 10655  | 1.04E-13  | 1.27E-11          |
| Plant hormone signal transduction                     | ko04075 | 67 out of 1148   | 253 out of 10655  | 4.67E-13  | 5.70E-11          |
| Flavonoid biosynthesis                                | ko00941 | 29 out of 1148   | 72 out of 10655   | 7.22E-11  | 8.81E-09          |
| Circadian rhythm - plant                              | ko04712 | 25 out of 1148   | 70 out of 10655   | 2.69E-08  | 3.28E-06          |
| Phenylalanine metabolism                              | ko00360 | 42 out of 1148   | 174 out of 110655 | 3.30E-07  | 4.02E-05          |
| Homologous recombination                              | ko03440 | 20 out of 1148   | 57 out of 110655  | 9.15E-07  | 0.000111629       |
| DNA replication                                       | ko03030 | 22 out of 1148   | 81 out of 10655   | 3.03E-05  | 0.003701157       |
| Amino sugar and nucleotide sugar metabolism           | ko00520 | 51 out of 1148   | 278 out of 10655  | 9.14E-05  | 0.011153652       |
| Cyanoamino acid metabolism                            | ko00460 | 22 out of 1148   | 87 out of 10655   | 9.85E-05  | 0.012021351       |
| Mismatch repair                                       | ko03430 | 18 out of 1148   | 66 out of 10655   | 0.0001482 | 0.018080172       |
| alpha-Linolenic acid metabolism                       | ko00592 | 22 out of 1148   | 99 out of 10655   | 0.0007023 | 0.085678806       |
| Linoleic acid metabolism                              | ko00591 | 6 out of 1148    | 12 out of 10655   | 0.0008036 | 0.098040764       |
| Zeatin biosynthesis                                   | ko00908 | 8 out of 1148    | 21 out of 10655   | 0.0009959 | 0.121496121       |
| Stilbenoid, diarylheptanoid and gingerol biosynthesis | ko00945 | 9 out of 1148    | 27 out of 10655   | 0.001467  | 0.178974276       |
| Flavone and flavonol biosynthesis                     | ko00944 | 8 out of 1148    | 24 out of 10655   | 0.0026827 | 0.327293834       |
| Carotenoid biosynthesis                               | ko00906 | 10 out of 1148   | 35 out of 10655   | 0.0029883 | 0.364571825       |
| Taurine and hypotaurine metabolism                    | ko00430 | 7 out of 1148    | 21 out of 10655   | 0.0049362 | 0.602214849       |
| Glycosphingolipid biosynthesis - ganglio series       | ko00604 | 4 out of 1148    | 8 out of 10655    | 0.006569  | 0.801423549       |
| Nitrogen metabolism                                   | ko00910 | 20 out of 1148   | 104 out of 10655  | 0.0070531 | 0.860482787       |
